# Supplementary material
Source: Springer Nature journal article supplement (https://www.springermedizin.de/resource/supplementary/12939_2010_166_MOESM3_ESM.pdf/9551632)
Supplement: MOESM3 [file 9551632]

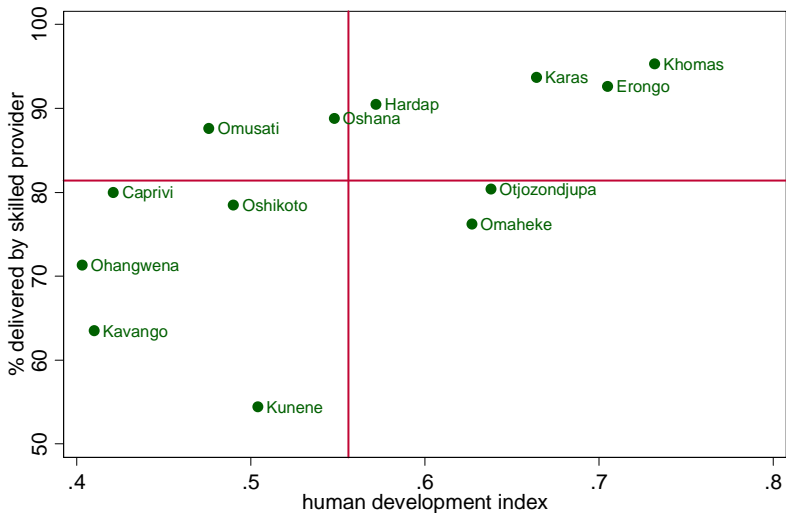

Note: The vertical & horizontal lines represent the means of the respective variables

Source of data: Namibia DHS 2006-07 & UNDP (2007)
